# Supplementary material for: On the competing effects of contemporary land management vs. landcover changes on global air quality
Source: Copernicus journal article supplement (doi:10.5194/acp-2021-132), 2021-03-23
Supplement: Supplementary file 1 [file acp-2021-132-supplement.pdf]

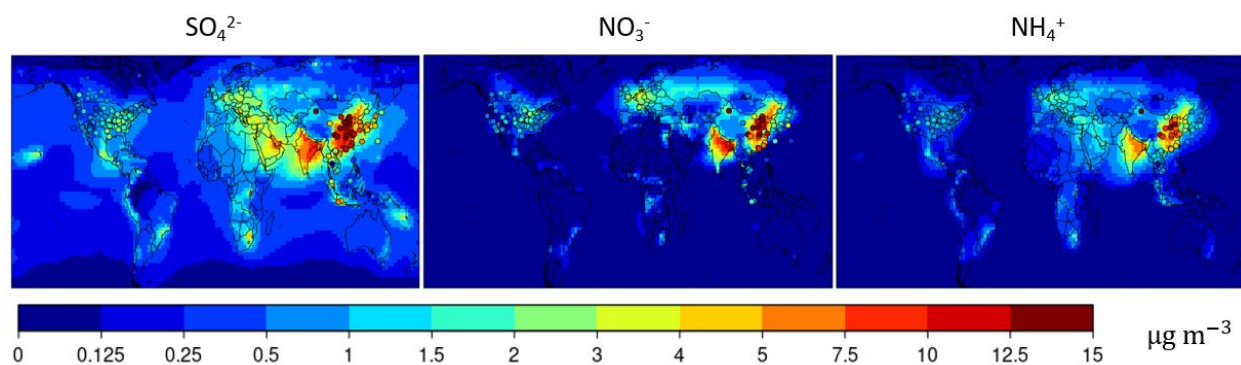

**Fig. S1** Modelled annual surface concentration of  $\text{SO}_4^{2-}$ ,  $\text{NO}_3^{2-}$  and  $\text{NH}_4^+$  aerosol for 2014. Filled circles indicate measured annual means for 2014 compiled from Air Quality System (AQS) of Environmental Protection Department (EPD) for United States (US), National Atmospheric Chemistry (NAtChem) database for Canada, European Monitoring and Evaluation Programme (EMEP) for Europe, Acid Deposition Monitoring Network in East Asia (EANET) for eastern Asia, and Geng et al. (2017) for China. The data from AQS, NAtChem, EMEP and EANET.

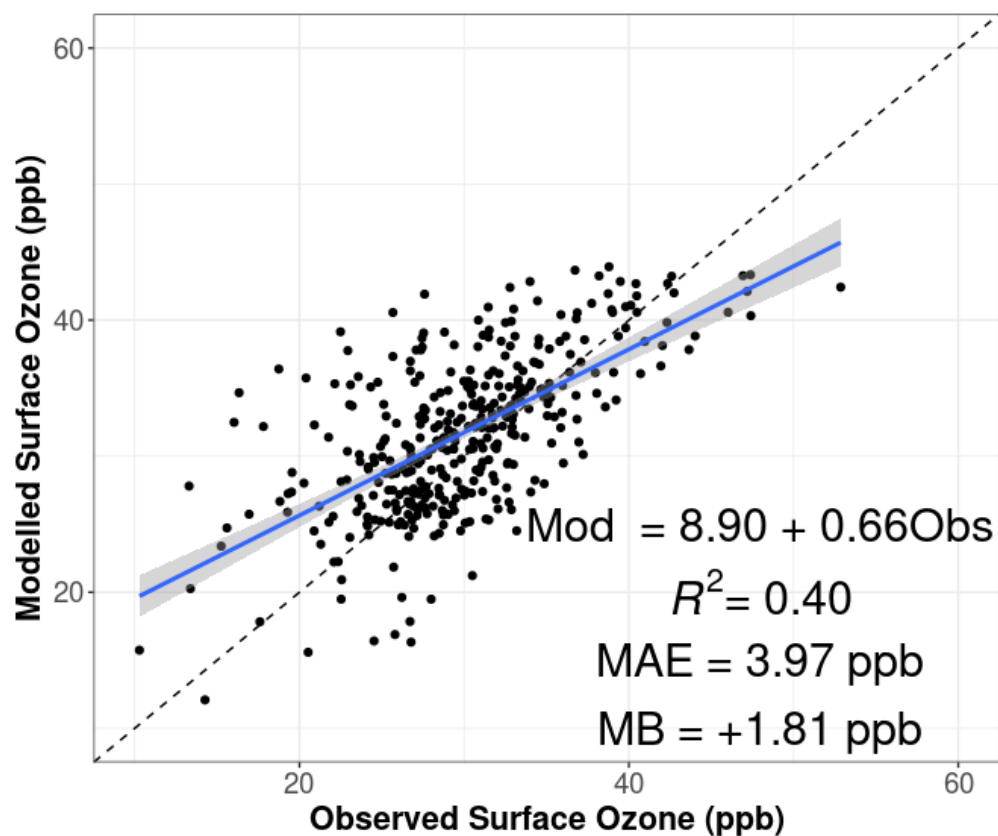

**Fig. S2** Comparison between mean modelled and observed surface ozone compiled by Sofen et al. (2016) at 2014. MAE and MB represents the mean absolute error and mean bias, respectively.

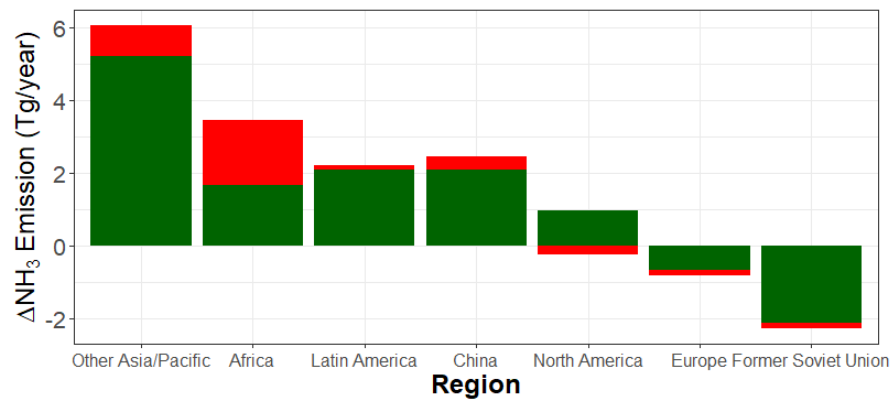

**Figure S3.** Regionally changes (2014 – 1992) in agricultural and non-agricultural  $\text{NH}_3$  emissions from CEDS.

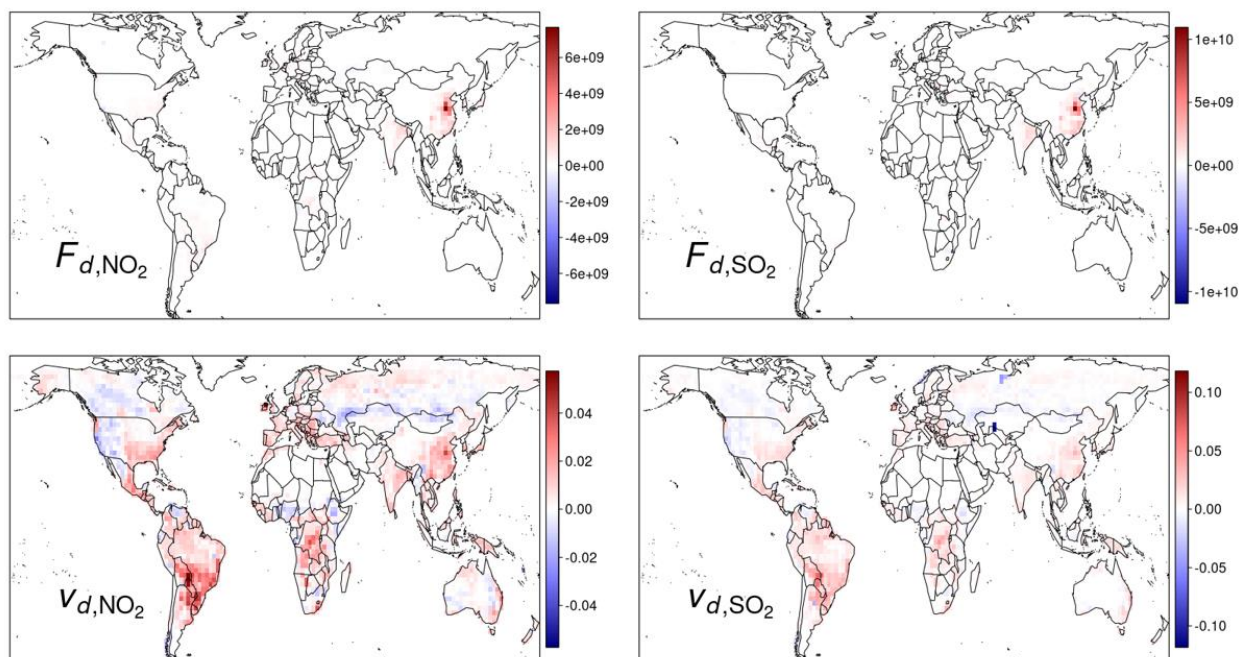

**Figure S4.** LULCC-induced changes in annual mean dry deposition ( $v_d$ ) velocity ( $\text{cm s}^{-1}$ ) and flux ( $F_d$ ) ( $\text{molec cm}^{-2} \text{s}^{-1}$ ) in of  $\text{NO}_2$  and  $\text{SO}_2$ .

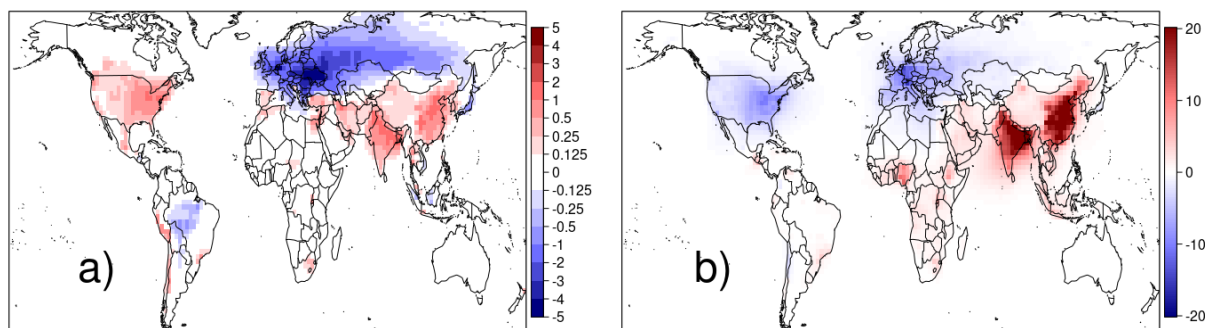

**Figure S5.** Change in annual mean  $\text{PM}_{2.5}$  (in  $\mu\text{g m}^{-3}$ ) due to a) LULCC and changes in agricultural emissions at 1992 anthropogenic emissions background (simulation 5 – simulation 1), and b) anthropogenic emission changes (including agricultural emissions) (simulation 4 – simulation 5).

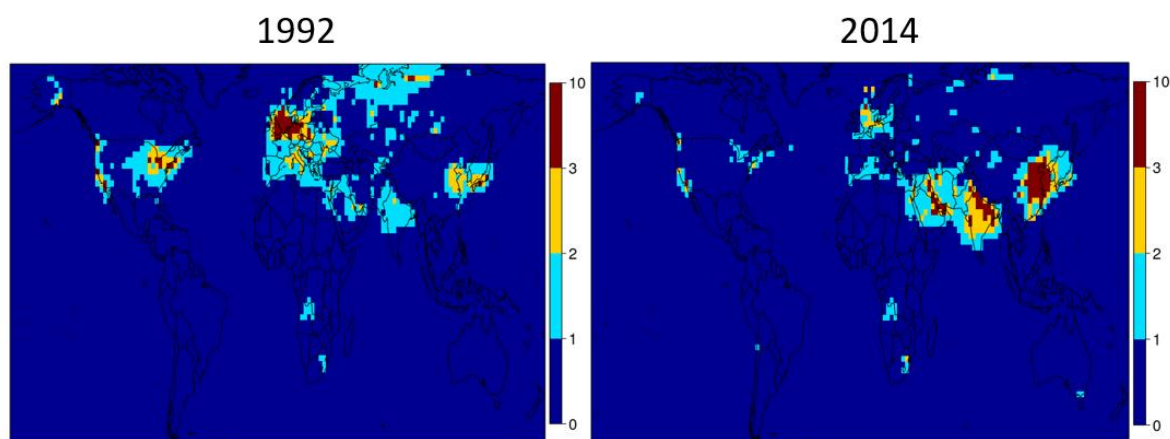

**Figure S6.** Annual mean surface  $\text{HNO}_3/\text{H}_2\text{O}_2$  ratio under 1992 and 2014 anthropogenic emission background.

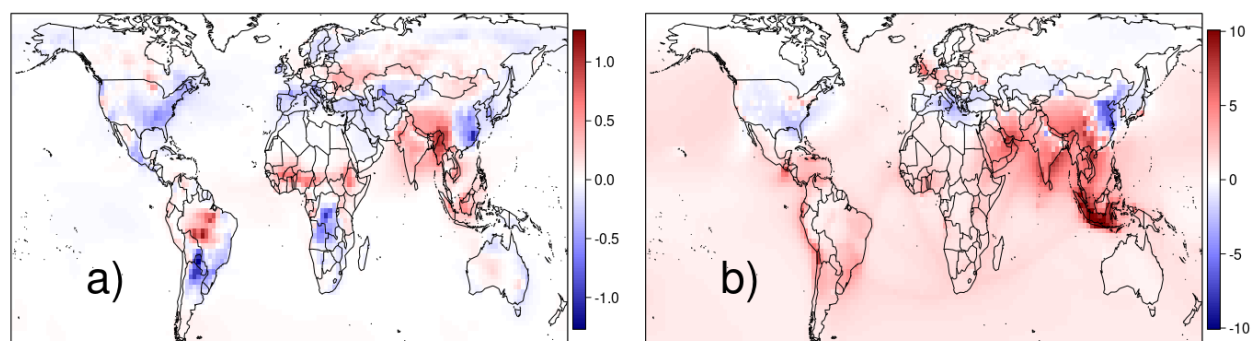

**Figure S7.** Change in annual mean surface  $\text{O}_3$  (in ppbv) due to a) LULCC and changes in agricultural emissions at 1992 anthropogenic emissions background (simulation 5 – simulation 1), and b) anthropogenic emissions changes (including agricultural emissions) (simulation 4 – simulation 5).

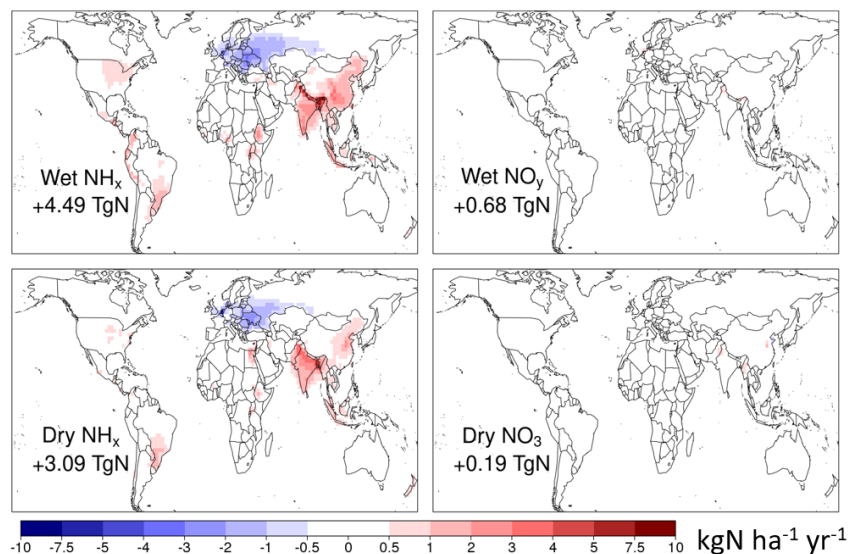

**Figure S8.** Contribution of different pathways (wet vs dry, reduced ( $\text{NH}_x$ ) vs oxidized ( $\text{NO}_y$ )) to the changes in total nitrogen deposition.  $\text{NH}_x \equiv \text{NH}_3 + \text{NH}_4$  and  $\text{NO}_y \equiv \text{NO} + \text{NO}_2 + \text{HONO} + \text{organic nitrates} + \text{aerosol nitrate}$ .

| Region | Species            | Mod  | Obs   | Mod/Obs |
|--------|--------------------|------|-------|---------|
| US     | $\text{SO}_4^{2-}$ | 0.88 | 1.27  | 0.70    |
|        | $\text{NO}_3^-$    | 0.77 | 0.93  | 0.83    |
|        | $\text{NH}_4^+$    | 0.54 | 0.69  | 0.79    |
| Canada | $\text{SO}_4^{2-}$ | 0.78 | 0.92  | 0.85    |
|        | $\text{NO}_3^-$    | 0.84 | 0.44  | 1.92    |
|        | $\text{NH}_4^+$    | 0.52 | 0.36  | 1.46    |
| Europe | $\text{SO}_4^{2-}$ | 1.84 | 2.08  | 0.88    |
|        | $\text{NO}_3^-$    | 1.67 | 1.51  | 1.10    |
|        | $\text{NH}_4^+$    | 1.16 | 1.11  | 1.05    |
| China  | $\text{SO}_4^{2-}$ | 8.53 | 18.93 | 0.45    |
|        | $\text{NO}_3^-$    | 6.16 | 10.15 | 0.61    |
|        | $\text{NH}_4^+$    | 4.83 | 7.61  | 0.64    |
| EANET  | $\text{SO}_4^{2-}$ | 2.33 | 3.64  | 0.64    |
|        | $\text{NO}_3^-$    | 1.09 | 1.31  | 0.84    |
|        | $\text{NH}_4^+$    | 1.15 | 1.01  | 1.14    |

**Table S1.** Comparison between modelled and observed annual average surface sulphate, nitrate and ammonium aerosol mass (in  $\mu\text{g m}^{-3}$ ) over different region/observational network. Measurements are compiled from Air Quality System (AQS) of Environmental Protection Department (EPD) for United States (US), National Atmospheric Chemistry (NAtChem) database for Canada, European Monitoring and Evaluation Programme (EMEP) for Europe, Acid Deposition Monitoring Network in East Asia (EANET) for eastern Asia, and Geng et al. (2017) for China. The data from AQS, NAtChem, EMEP and EANET are collect in 2014.

| Region                             | Countries included                                                                                                                                                          |
|------------------------------------|-----------------------------------------------------------------------------------------------------------------------------------------------------------------------------|
| Former Soviet Union (FSU)          | Armenia, Azerbaijan, Belarus, Georgia, Kazakhstan, Kyrgyzstan, Moldova, Russia, Tajikistan, Turkmenistan, Ukraine, Uzbekistan                                               |
| Western Europe (WEU)               | Austria, Belgium, Switzerland, Germany, Denmark, Spain, Finland, France, United Kingdom, Greece, Ireland, Iceland, Italy, Luxembourg, Netherlands, Norway, Portugal, Sweden |
| Central and eastern Europe (CEU)   | Albania, Bulgaria, Bosnia and Herzegovina, Cyprus, Czechia, Estonia, Croatia, Hungary, Kosovo, Lithuania, Latvia, Montenegro, Poland, Romania, Serbia, Slovakia, Slovenia   |
| China                              | China                                                                                                                                                                       |
| South Asia (SAs)                   | Afghanistan, Bangladesh, Bhutan, India, Sri Lanka, Nepal, Pakistan                                                                                                          |
| Middle East (ME)                   | United Arab Emirates, Egypt, Iran, Iraq, Israel, Kuwait, Lebanon, Oman, Qatar, Saudi Arabia, Syria, Turkey, West Bank, Yemen                                                |
| Southeast Asia (SEA)               | Brunei, Indonesia, Cambodia, Laos, Myanmar, Malaysia, Philippines, Thailand, Vietnam                                                                                        |
| Japan and Korea (JK)               | Japan, South Korea, North Korea                                                                                                                                             |
| Australasia (Aus)                  | Australia, Fiji, New Caledonia, New Zealand, Papua New Guinea, Solomon Islands, Vanuatu                                                                                     |
| North America (NA <sub>m</sub> )   | Canada, United States                                                                                                                                                       |
| Central America (CA <sub>m</sub> ) | Belize, Costa Rica, Cuba, Guatemala, Honduras, Haiti, Jamaica, Mexico, Nicaragua, Panama, Puerto Rico, El Salvador, Trinidad and Tobago                                     |
| South America (SA <sub>m</sub> )   | Argentina, Bolivia, Brazil, Chile, Colombia, Ecuador, Guyana, Peru, Paraguay, Suriname, Uruguay, Venezuela, French Guiana                                                   |
| Northern Africa (NA <sub>f</sub> ) | Algeria, Libya, Morocco, Tunisia                                                                                                                                            |
| Western Africa (WA <sub>f</sub> )  | Benin, Burkina Faso, Ivory Coast, Cameroon, Gabon, Ghana, Guinea, Gambia, Guinea Bissau, Liberia, Mali, Mauritania, Niger, Nigeria, Senegal, Sierra Leone, Chad, Togo       |
| Southern Africa (SA <sub>f</sub> ) | Angola, Botswana, Lesotho, Mozambique, Malawi, Namibia, Swaziland, South Africa, Zambia, Zimbabwe                                                                           |
| Eastern Africa (EA <sub>f</sub> )  | Burundi, Djibouti, Eritrea, Ethiopia, Kenya, Madagascar, Rwanda, Sudan, Somaliland, Somalia, Uganda                                                                         |

**Table S2.** Definition of regions.

| Region <sup>†</sup> | $\Delta\text{PM}_{2.5}(\text{LULCC+agr\_emis},1992)$ | $\Delta\text{O}_3(\text{LULCC+agr\_emis},1992)$ |
|---------------------|------------------------------------------------------|-------------------------------------------------|
| FSU                 | -0.69 (-1.95)                                        | -                                               |
| WEU                 | -0.49 (-1.24)                                        | -                                               |
| CEU                 | -2.03 (-2.22)                                        | -                                               |
| China               | +0.34 (+0.75)                                        | +0.09 (-0.21)                                   |
| SAs                 | +0.55 (+0.82)                                        | +0.26 (+0.25)                                   |
| ME                  | +0.20 (+0.33)                                        | -                                               |
| SEA                 | +0.21 (+0.17)                                        | +0.32 (+0.26)                                   |
| JK                  | -0.08 (-0.23)                                        | -                                               |
| NAm                 | +0.15 (+0.56)                                        | -0.05 (-0.21)                                   |
| CAm                 | +0.10 (+0.22)                                        | -                                               |
| Waf                 | -                                                    | +0.20 (+0.30)                                   |
| Eaf                 | -                                                    | +0.16 (+0.27)                                   |
| Global              | -0.08 (+0.23)                                        | +0.01 (+0.03)                                   |

**Table S3.** Changes in area averaged, and population-weighted (in parentheses), annual mean surface  $\text{PM}_{2.5}$  ( $\Delta\text{PM}_{2.5}(\text{LULCC+agr\_emis},1992)$ , in  $\mu\text{g m}^{-3}$ ) and  $\text{O}_3$  ( $\Delta\text{O}_3(\text{LULCC+agr\_emis},1992)$ , in ppbv) concentrations due to combined effects of LULCC and agricultural emission evaluated under 1992 anthropogenic emission background. Results only from regions with area- or population-weighted average  $\Delta\text{PM}_{2.5}(\text{LULCC+agr\_emis},1992) > 0.2 \mu\text{g m}^{-3}$  or  $\Delta\text{O}_3(\text{LULCC+agr\_emis},1992) > 0.2$  ppbv are shown.

<sup>†</sup>The definitions and abbreviations of all regions can be found in Table S2.
